# Supplementary material for: A portable molecularly imprinted polymer-modified microchip sensor for the rapid detection of perfluorooctanoic acid
Source: Royal Society of Chemistry journal article supplement (doi:10.1039/d3an00653k), 2023-01-01
Supplement: d3an00653k1.pdf [file d3an00653k1.pdf]

## Supplementary Information

For

### A Portable Molecularly Imprinted Polymer-Modified Microchip Sensor for Rapid Detection of Perfluorooctanoic Acid

Yingmei Wei<sup>a</sup>, Hongjie Liu<sup>b,c</sup>, Shaopeng Wang<sup>a</sup>, Kefu Yu<sup>\*a,d</sup>, Liwei Wang<sup>\*a,c,d</sup>

<sup>a</sup> School of Marine Sciences, Coral Reef Research Center of China, Guangxi Laboratory on the Study of Coral Reefs in the South China Sea, Guangxi University, Nanning, 530004, PR China

<sup>b</sup> School of Chemistry and Chemical Engineering, Guangxi University, Nanning 530004, P.R. China

<sup>c</sup> Guangxi Key Laboratory of Processing for Non-ferrous Metallic and Featured Materials, Guangxi University, Nanning, 530004, PR China

<sup>d</sup> Southern Marine Science and Engineering Guangdong Laboratory (Zhuhai), Zhuhai, 519080, PR China

#### \*Corresponding Authors

Email address: wangliwei0427@163.com (A/Prof. L. W. Wang);

kefuyu@scsio.ac.cn (Prof. K. F. Yu)

# 1. Experimental Section

## 1.1 Materials and Reagents

perfluorooctanoic acid (PFOA, 95%), o-phenylenediamine (o-PD, >98%), perfluorooctanesulfonic acid potassium salt (PFOS,  $\geq$ 98%), Perfluorobutanoic acid (PFBA, 98%), Perfluorobutanesulfonic acid (PFBS, 98%), Tris-HCl, humic acid and dopamine hydrochloride were purchased from Sigma-Aldrich;  $\text{CuSO}_4 \cdot 5\text{H}_2\text{O}$ ,  $\text{CoCl}_2 \cdot 6\text{H}_2\text{O}$ ,  $\text{Ni}(\text{NO}_3)_2 \cdot 6\text{H}_2\text{O}$ , glucose, NaOH were purchased from Sinopharm Chemical Reagent Co. Ltd. Ethanol was purchased from Chengdu Chron Chemicals Co. Ltd. Urea were purchased from Macklin (Shanghai, China); Fresh lemon juice was bought from local market.

## 1.2 Preparation of the $\text{Cu}_2\text{O}$ Precursor

A slight modification was made to the literature-based synthesis procedure for the  $\text{Cu}_2\text{O}$  precursor<sup>S1</sup>. Firstly, 10 mL of fresh lemon juice was diluted with 30 mL of DI water under thorough stirring, which was put into a 50 mL stainless steel autoclave and hydrothermal treatment for 5 h in an oven at 180°C. Then, a syringe filter with a pore size of 0.22  $\mu\text{m}$  was used to filter the reddish-brown solution. The acquired solution was named "solution A" and stored at 4°C. Typically, 0.5 g of  $\text{CuSO}_4 \cdot 5\text{H}_2\text{O}$  and 7.5 mL of "solution A" were stirred into 42.5 mL of DI water to be dissolved; then 10 mL of NaOH (1 M) was added after the above-mentioned solution was heated to 60°C, and then 10 mL of glucose solution (0.3 M) was injected quickly; after remaining at 60°C for 3 h, the products were centrifugated, and washed several times with DI water and ethanol. Finally, the  $\text{Cu}_2\text{O}$  precursor products were dried overnight at 80°C. The relevant chemical reactions are as follow:

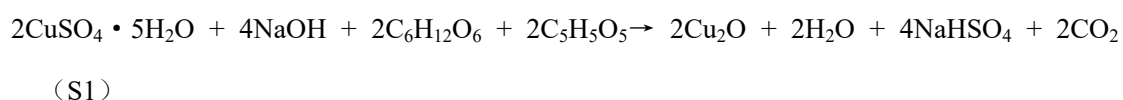

## 1.3 Preparation of the $\text{Cu}_2\text{O}@C$ Precursor

After homogeneously dispersing 320 mg of the  $\text{Cu}_2\text{O}$  template by sonication for 30 min in Tris-buffer solution (100 mL, 10 mM), dopamine hydrochloride (160 mg)

was added and continually stirred for 3 h. Centrifugation was used to collect the Cu<sub>2</sub>O@PDA product, which was then washed three times with DI water and ethanol before being dried overnight at 60°C. Then, with a heating rate of 2°C min<sup>-1</sup>, the obtained Cu<sub>2</sub>O@PDA product was annealed in N<sub>2</sub> at 500°C for 3 h to get a Cu<sub>2</sub>O@C precursor<sup>S2</sup>.

#### 1.4 Preparation of the Cu<sub>2</sub>O@C@NiCo<sub>2</sub>O<sub>4</sub> Composite

The obtained Cu<sub>2</sub>O@C precursor (100 mg) was dispersed into 15 mL of ethanol and sonicated for 10 min. Then, 20 mM of Co(NO<sub>3</sub>)<sub>2</sub>·6H<sub>2</sub>O, 10 mM of Ni(NO<sub>3</sub>)<sub>2</sub>·6H<sub>2</sub>O, 90 mM of urea and 30 mL of DI water were added, and the solution was bathed in 90 °C with vigorous magnetic stirring for 6 h. After that, centrifugation was used to collect the product, which was washed several times with ethanol and DI water, and then dried overnight at 60°C, followed by 2 h of air annealing at 300°C with a heating rate of 2°C min<sup>-1</sup> to obtain the final electrode material of Cu<sub>2</sub>O@C@NiCo<sub>2</sub>O<sub>4</sub><sup>S3</sup>. The corresponding chemical reaction can be expressed as follows<sup>S4</sup>:

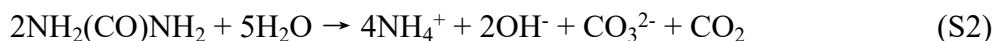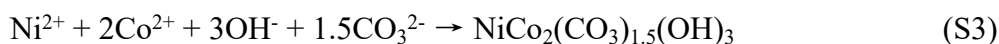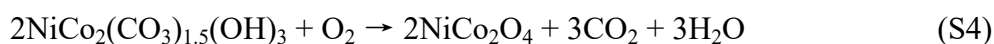

#### 1.5 Fabrication process of the FR-4 Au chip MIP-PFOA electrode

The FR-4 Au chip electrodes was commercial electrode bought from Guangzhou Yuxin Sensor Technology Co., Ltd., and the fabrication process of the FR-4 Au chip MIP-PFOA electrode can be seen in **Figure S1**, which is similar to the fabrication of in the Au electrode in **Scheme 1**. Moreover, the detailed parameters of the FR-4 Au chip electrode was listed in **Table S1**.

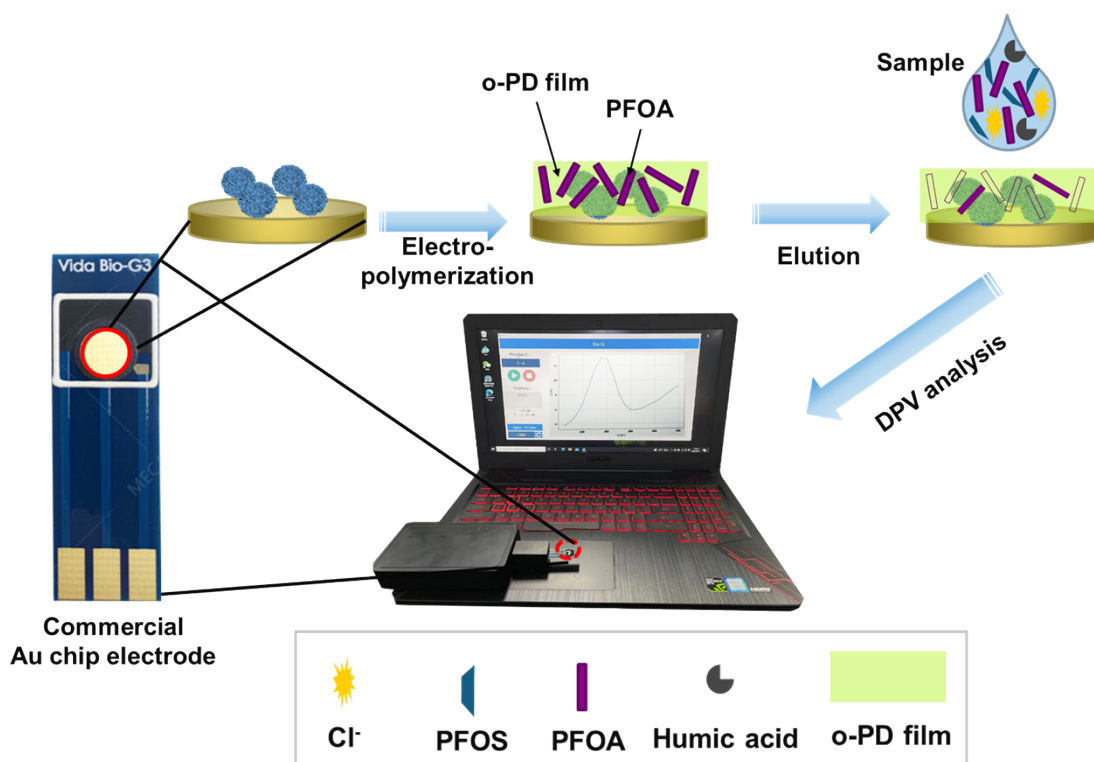

**Figure S1.** The fabrication process of the FR-4 Au chip MIP-PFOA electrode.

**Table S1.** The detailed parameters of the FR-4 Au chip electrode

|                              |                            |
|------------------------------|----------------------------|
| Material                     | FR-4 epoxy resin substrate |
| Working electrode            | Au electrode               |
| Counter electrode            | Glass electrode            |
| Reference electrode          | Ag/AgCl electrode          |
| Size (mm <sup>2</sup> )      | 40 × 12.5                  |
| Surface (μm)                 | Au 0.08                    |
| Conductive inner layer (μm)  | Cu 35.0                    |
| Work area (mm <sup>2</sup> ) | 23.75                      |

## 1.6 Details of Randel's Equivalent Circuit Model

In the inset of **Figure 1f**,  $R_{ct}$ ,  $R_s$ ,  $Z_w$ , and  $C_{dl}$  are combined into an equivalent circuit model to describe the interaction between an electrode and a solutions <sup>S5,S6</sup>  $R_{ct}$  represents charge transfer resistance, which is the resistance to electron transfer caused

by chemical reactions and mass transfer in electrochemical reactions. It is commonly used to describe the electrochemical reaction at the electrode surface. The larger the value of  $R_{ct}$ , the more significant the effect of potential on the charge transfer rate.  $R_s$  represents electrolyte resistance, which is the resistance to ion transport in a water solution. The existence of  $R_s$  is mainly due to the interaction between the charges on the electrode surface and ions, leading to changes in ion concentration with distance from the electrode surface and resulting in resistance.  $Z_w$  represents Warburg impedance, which arises from the diffusion of species in the electrochemical system and is modeled by the Warburg element (or Warburg component), which is a resistance due to the diffusion of electrolytic species and is often represented as a sloping linear segment. The slope of the Warburg element also changes with the movement of the electrolyte and the diffusion rates of different species.  $C_{dl}$  represents the double layer capacitance of the electrode and is modeled as a capacitance consisting of two layers of dielectric.

The combination of these elements in an equivalent circuit model forms a complex circuit model that can help in understanding the complex interaction between both electrode surface and electrolyte. Generally, the ohmic resistance ( $R_s$ ) with the origin of the axis to the beginning of the semicircle shows the internal resistance of the electrodes and electrolyte. The charge transfer impedance ( $R_{ct}$ ) is illustrated by the obvious semicircle in the intermediate frequency region. Warburg impedance ( $Z_w$ ) is named as the solid-state diffusion resistance, which can be reflected in the slope line at low-frequency regions. The constant phase elements ( $C_{dl}$ ) are ascribed to the double-layer capacitance.

As for the equivalent circuit model for MIP-based sensor, the model can be modified as follow:

In the EIS equivalent circuit model, both  $C_{dl}$  and CPE are components used to describe the double layer capacitance.  $C_{dl}$  represents the double layer capacitance and

is modeled as a capacitance consisting of two layers of dielectric. It is commonly used to describe charge transfer at the surface of a solid electrode and electrolyte capacitance.  $C_{dl}$  can be considered as a thin capacitance, and its capacitance value changes with variation in potential. CPE, on the other hand, is a capacitance resistor element that can be thought of as a capacitance reflecting the complexity of charge accumulation and exchange between the electrode and the solution, and non-ideal nature of the surface. It is typically used to describe non-electrochemical reactions such as surface species adsorption, chemical exchange, or unconventional impedance characteristics. In summary,  $C_{dl}$  is typically used to describe the dynamics of charge transfer, while CPE is often used to describe the non-ideal nature of the surface. Furthermore,  $C_{dl}$  has a changing capacitance value while CPE has a nonlinear response to voltage or current similar to electrical conductivity.

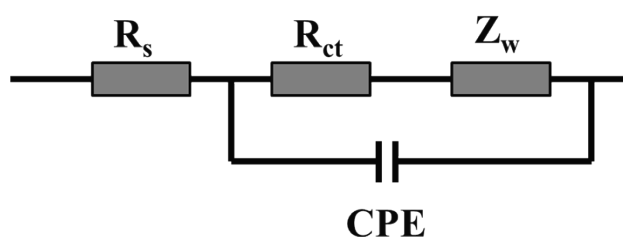

**Figure S2.** The equivalent circuit model of MIP-based sensor.

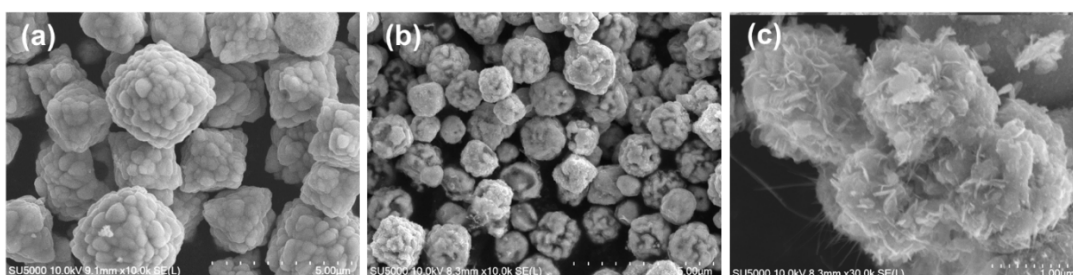

**Figure S3.** The lower magnified FE-SEM images of (a) Cu<sub>2</sub>O, (b) Cu<sub>2</sub>O@C and (c) Cu<sub>2</sub>O@C@NiCo<sub>2</sub>O<sub>4</sub>.

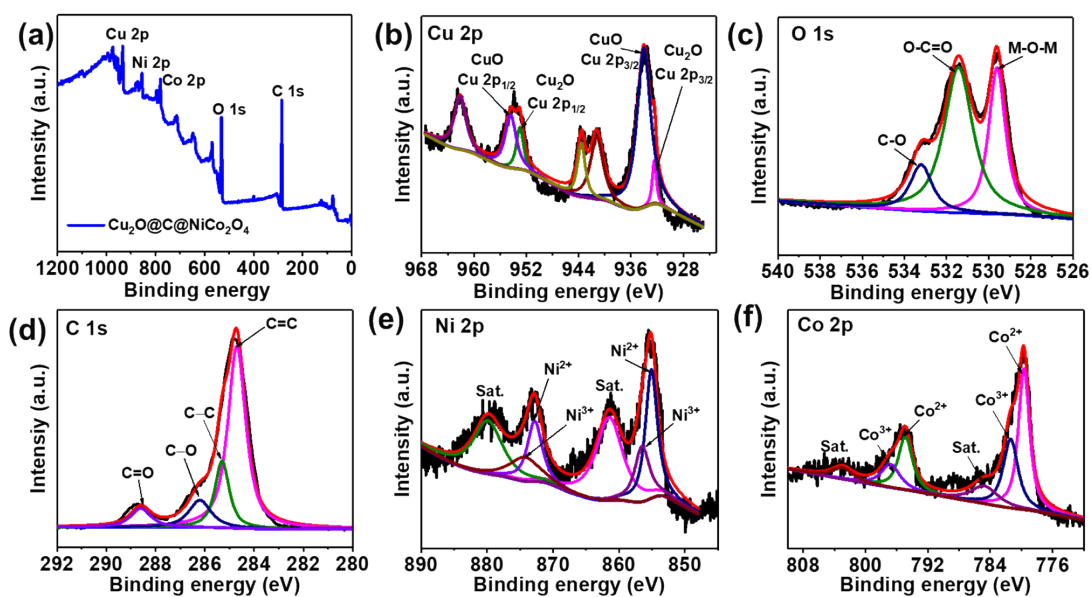

**Figure S4.** (a) XPS survey spectrum of  $\text{Cu}_2\text{O}@C@Ni\text{Co}_2\text{O}_4$ . High resolution XPS spectra of (b) Cu 2p, (c) O 1s, (d) C 1s, (e) Ni 2p and (f) Co 2p in the  $\text{Cu}_2\text{O}@C@Ni\text{Co}_2\text{O}_4$ .

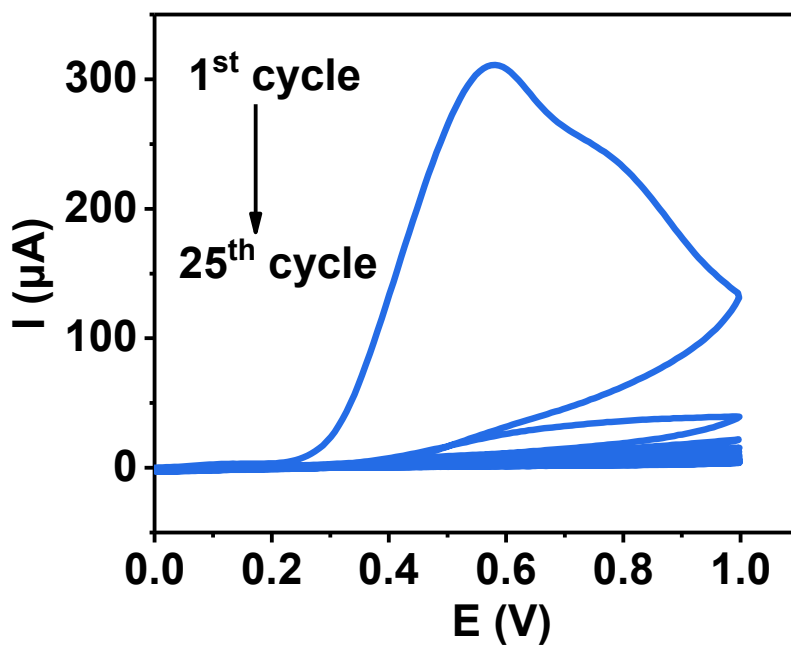

**Figure S5.** CV of the Au electrode representing oxidative electro-polymerization of 10 mM o-PD in the absence and the presence of 1 mM PFOA in acetate buffer (pH=5.8) and methanol (2:1, v/v) solution over 25 cycles at a scan rate of  $200 \text{ mV s}^{-1}$ .

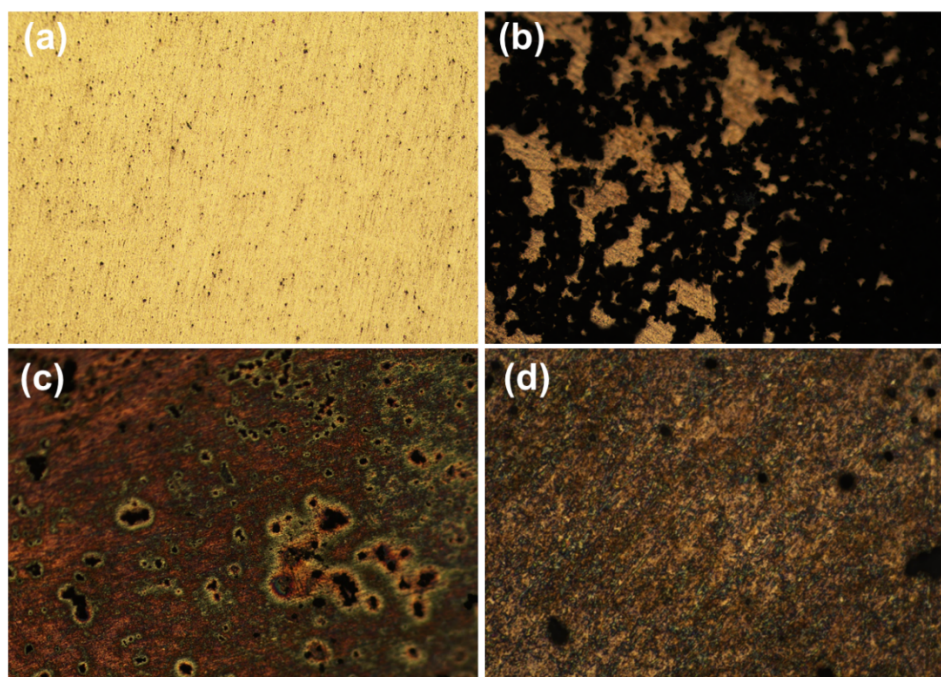

**Figure S6.** The metallurgical microscope characterizations of (a) bare Au electrode, (b) initial electrode, (c) MIP electrode, and (d) MIP-PFOA electrode.



**Table S2.** Comparison with other methods for the determination of PFOA and PFOS.

| <b>Methods</b>                                | <b>Need Preconcentration<br/>or not</b> | <b>Instrument<br/>price</b> | <b>LOD<br/>(ng/L)</b> | <b>Analyte</b>   | <b>ref</b> |
|-----------------------------------------------|-----------------------------------------|-----------------------------|-----------------------|------------------|------------|
| genetically engineered<br>bacterial biosensor | yes                                     | high                        | 10 and 10             | PFOS and<br>PFOA | S7         |
| resonance light<br>scattering                 | yes                                     | low                         | 4557.7                | PFOA             | S8         |
| surface plasmon<br>resonance                  | yes                                     | low                         | 130                   | PFOA             | S9         |
| photoluminescence<br>sensing                  | no                                      | low                         | 10351.75              | PFOA             | S10        |
| fluorospectrophotometry                       | no                                      | low                         | 59.9                  | PFOS             | S11        |
| fluorescent sensor                            | yes                                     | low                         | 6387 and 4886         | PFOS and<br>PFOA | S12        |
| Colorimetric                                  | yes                                     | low                         | $1.03 \times 10^5$    | PFOA             | S13        |
| Colorimetric                                  | yes                                     | low                         | 496.88                | PFOA             | S14        |
| LC-MS                                         | yes                                     | high                        | 231.88 and 265        | PFOS and<br>PFOA | S15        |
| nESI-MS                                       | yes                                     | high                        | 11                    | PFOA             | S16        |
| d-SPE-GC-MS                                   | yes                                     | high                        | 2.6                   | PFOA             | S17        |
| MIP sensor                                    | no                                      | low                         | 24.95                 | PFOA             | S18        |
| MIP sensor                                    | no                                      | low                         | 0.08                  | HFPO-DA          | S19        |
| MIP sensor                                    | no                                      | low                         | 1.69                  | PFOS             | S20        |
| MIP sensor                                    | no                                      | low                         | 7.49                  | PFOS             | S21        |
| MIP sensor                                    | no                                      | low                         | 2095.8                | PFOS             | S22        |
| MIP sensor                                    | no                                      | low                         | 19.96                 | PFOS             | S23        |
| MIP sensor                                    | no                                      | low                         | 41407                 | PFOS             | S24        |
| MIP sensor                                    | no                                      | low                         | 19.47                 | PFOA             | This work  |

nESI-MS: nano-electrospray ionization mass spectrometry

**Table S3.** Determination of PFOA in real seawater samples using the MIP-based chip sensor.

| Sample | Added (nM) | Found (nM) | Recovery (%) | RSD (%) |
|--------|------------|------------|--------------|---------|
| 1      | 0.1        | 0.096      | 98.7         | 2.4     |
| 2      | 0.5        | 0.58       | 103.8        | 1.5     |
| 3      | 1          | 1.02       | 102.5        | 3.5     |

### Reference:

- S1 G. Muthusankar, M. Sethupathi, S. M. Chen, R. K. Devi, R. Vinoth, G. Gopu, N. Anandhan and N. Sengottuvelan, *Compos. Part B Eng.*, 2019, **174**, 106973.
- S2 S. Wang, B. Y. Guan and X. W. Lou, *Energy Environ. Sci.*, 2018, **11**, 306–310.
- S3 G. Gao, H. Bin Wu, S. Ding, L. M. Liu and X. W. Lou, *Small*, 2015, **11**, 804–808.
- S4 X. Luo, M. Huang, D. He, M. Wang, Y. Zhang and P. Jiang, *Analyst*, 2018, **143**, 2546–2554.
- S5 D. Balciunas, D. Plausinaitis, V. Ratautaite, A. Ramanaviciene and A. Ramanavicius, *Talanta*, 2022, **241**, 123252.
- S6 D. Wang, J. Wang, J. Zhang, Y. Li, Y. Zhang, Y. Li and B. C. Ye, *Talanta*, 2019, **196**, 479–485.
- S7 G. Sunantha and N. Vasudevan, *Sci. Total Environ.*, 2021, **759**, 143544.
- S8 F. Zhang, Y. Zheng, J. Liang, S. Long, X. Chen and K. Tan, *Spectrochim. Acta - Part A Mol. Biomol. Spectrosc.*, 2016, **159**, 7–12.
- S9 N. Cennamo, G. D’Agostino, G. Porto, A. Biasiolo, C. Perri, F. Arcadio and L. Zeni, *Sensors (Switzerland)*, 2018, **18**, 1–11.
- S10 L. Zheng, Y. Zheng, Y. Liu, S. Long, L. Du, J. Liang, C. Huang, M. T. Swihart and K. Tan, *Talanta*, 2019, **194**, 1–6.

- S11 J. Liang, X. Deng and K. Tan, *Spectrochim. Acta - Part A Mol. Biomol. Spectrosc.*, 2015, **150**, 772–777.
- S12 Z. Cheng, L. Du, P. Zhu, Q. Chen and K. Tan, *Spectrochim. Acta - Part A Mol. Biomol. Spectrosc.*, 2018, **201**, 281–287.
- S13 M. Takayose, K. Akamatsu, H. Nawafune, T. Murashima and J. Matsui, *Anal. Lett.*, 2012, **45**, 2856–2864.
- S14 C. Fang, X. Zhang, Z. Dong, L. Wang, M. Megharaj and R. Naidu, *Chemosphere*, 2018, **191**, 381–388.
- S15 R. Knob, V. Maier, J. Petr, V. Ranc and J. Ševčík, *Electrophoresis*, 2012, **33**, 2159–2166.
- S16 P. Suwannakot, F. Lisi, E. Ahmed, K. Liang, R. Babarao, J. J. Gooding and W. A. Donald, *Anal. Chem.*, 2020, **92**, 6900–6908.
- S17 S. Y. Ma, J. Wang, L. Fan, H. L. Duan and Z. Q. Zhang, *J. Chromatogr. A*, 2020, **1611**, 460616.
- S18 R. Kazemi, E. I. Potts and J. E. Dick, *Anal. Chem.*, 2020, **92**, 10597–10605.
- S19 M. W. Glasscott, K. J. Vannoy, R. Kazemi, M. D. Verber and J. E. Dick, *Environ. Sci. Technol. Lett.*, 2020, **7**, 489–495.
- S20 R. B. Clark and J. E. Dick, *ACS Sensors*, 2020, **5**, 3591–3598.
- S21 D. Lu, D. Z. Zhu, H. Gan, Z. Yao, J. Luo, S. Yu and P. Kurup, *Sensors Actuators B Chem.*, 2022, **352**, 131055.
- S22 Y. Gao, W. Gou, W. Zeng, W. Chen, J. Jiang and J. Lu, *Microchem. J.*, 2023, **187**, 108378.
- S23 N. Karimian, A. M. Stortini, L. M. Moretto, C. Costantino, S. Bogialli and P. Ugo, *ACS Sensors*, 2018, **3**, 1291–1298.
- S24 C. Fang, Z. Chen, M. Megharaj and R. Naidu, *Environ. Technol. Innov.*, 2016, **5**, 52–59.
